# Supplementary material for: HDAC2 Regulates Glial Cell Activation in Ischemic Mouse Retina
Source: MDPI journal article supplement (doi:10.3390/ijms20205159), 2019-10-17
Supplement: s1 [file s1]

## Supplementary

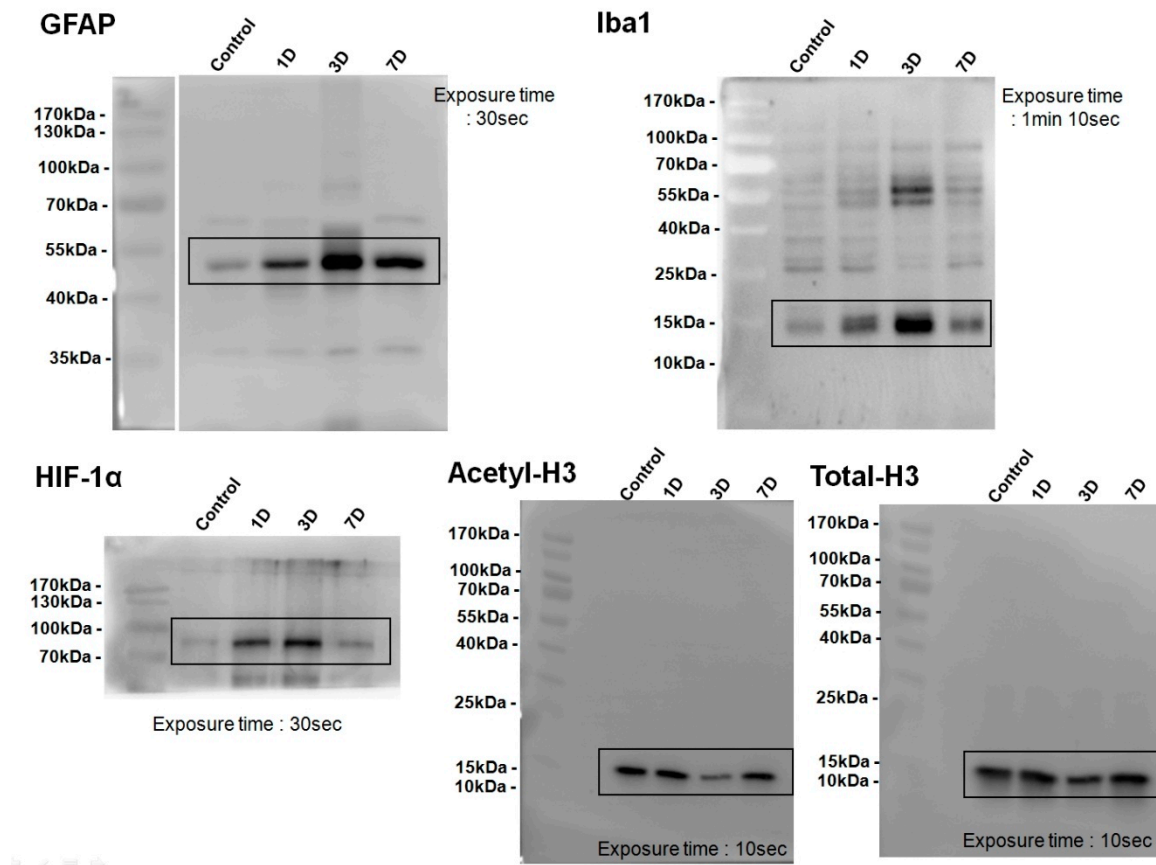

**Supplementary Figure S1.** Full size immunoblot image with molecular weight ladders, using anti-GFAP, anti-Iba1, anti-HIF-1 $\alpha$ , anti-acetyl-H3, or anti-total-H3 after retinal IR injury. Cropped areas are shown in black box regions.

## 2 Activation of HDAC2 in ischemic mouse retina

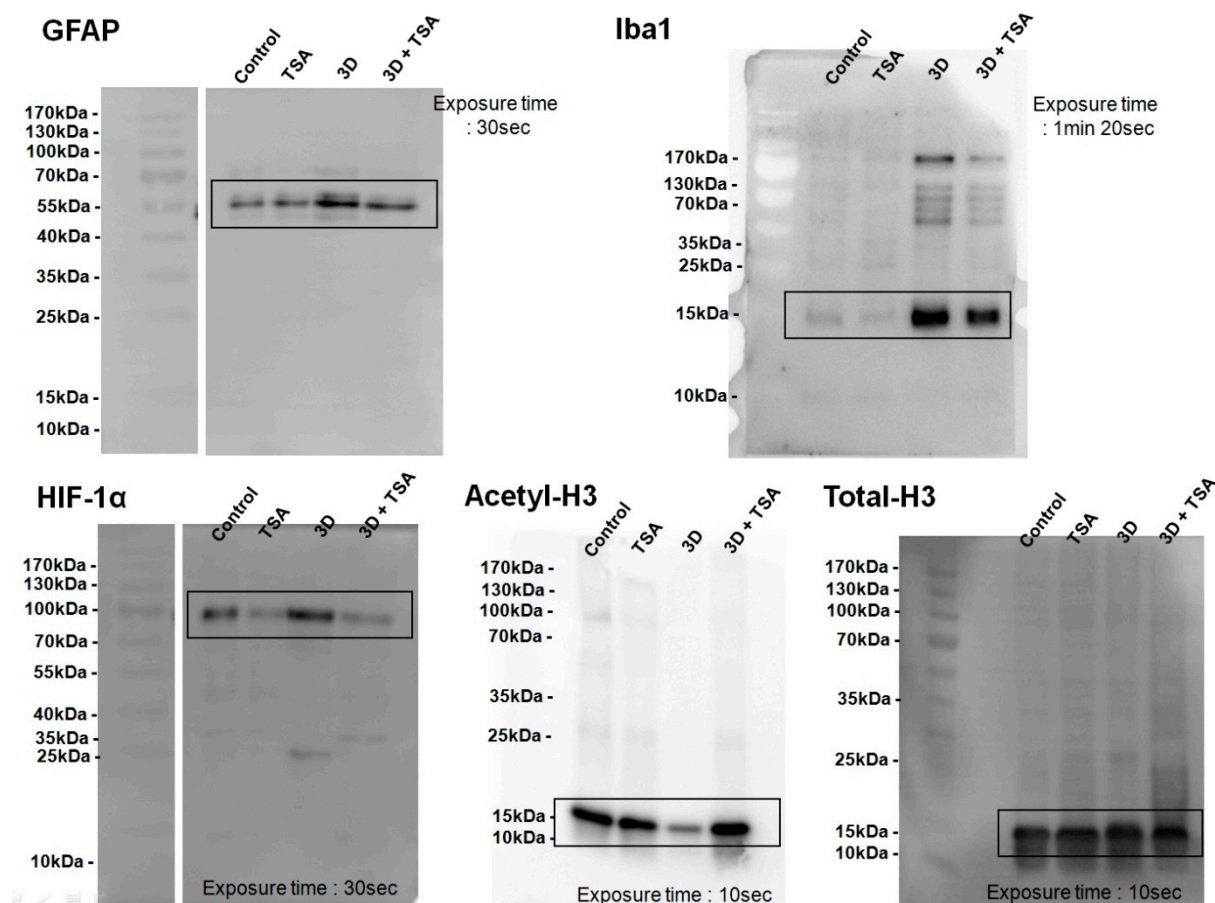

**Supplementary Figure S2.** Effect of TSA on expression of GFAP, Iba1, HIF-1 $\alpha$ , and acetyl-H3 in ischemic retinas. Full size immunoblot images with molecular weight ladders are presented. Cropped areas are shown in black box regions.
